# Supplementary material for: Antroxazole A, an oxazole-containing chamigrane dimer from the fungusAntrodiella albocinnamomeawith immunosuppressive activity
Source: Royal Society of Chemistry journal article supplement (doi:10.1039/d2ob01443b), 2022-01-01
Supplement: d2ob01443b1.pdf [file d2ob01443b1.pdf]

*Supporting information for*

## **Antroxazole A, an oxazole-containing chamigrane dimer from the fungus *Antrodiella albocinnamomea* with immunosuppressive activity**

Juan He,<sup>‡a</sup> Wei-Wei Yu,<sup>‡a</sup> Masahiko Isaka,<sup>b</sup> Russell J Cox,<sup>c</sup> Ji-Kai Liu<sup>\*a</sup> and Tao Feng<sup>\*a</sup>

<sup>a</sup>*School of Pharmaceutical Sciences, South-Central University for Nationalities, Wuhan 430074, China*

<sup>b</sup>*National Center for Genetic Engineering and Biotechnology (BIOTEC), 113 Thailand Science Park, Phaholyothin Road, Klong Luang, Pathumthani 12120, Thailand*

<sup>c</sup>*Institute for Organic Chemistry and Biomolekulares Wirkstoffzentrum (BMWZ), Schneiderberg 38, 30167 Hannover, Germany*

\*Corresponding authors. tfeng@mail.scuec.edu.cn (T. Feng), liujikai@mail.scuec.edu.cn (J. K. Liu)

### **List of Supporting Information**

#### **Figure legends**

**Figure S1.** <sup>1</sup>H NMR spectrum for antroxazole A (1)

**Figure S2.** <sup>13</sup>C and DEPT NMR spectra for antroxazole A (1)

**Figure S3.** HSQC spectrum for antroxazole A (1)

**Figure S4.** HMBC spectrum for antroxazole A (1)

**Figure S5.** <sup>1</sup>H-<sup>1</sup>H COSY spectrum for antroxazole A (1)

**Figure S6.** ROESY spectrum for antroxazole A (1)

**Figure S7.** HRESIMS for antroxazole A (1)

**Crystal data and structure refinement for antroxazole A (1)**

Figure S1. <sup>1</sup>H NMR spectrum for antroxazole A (1)

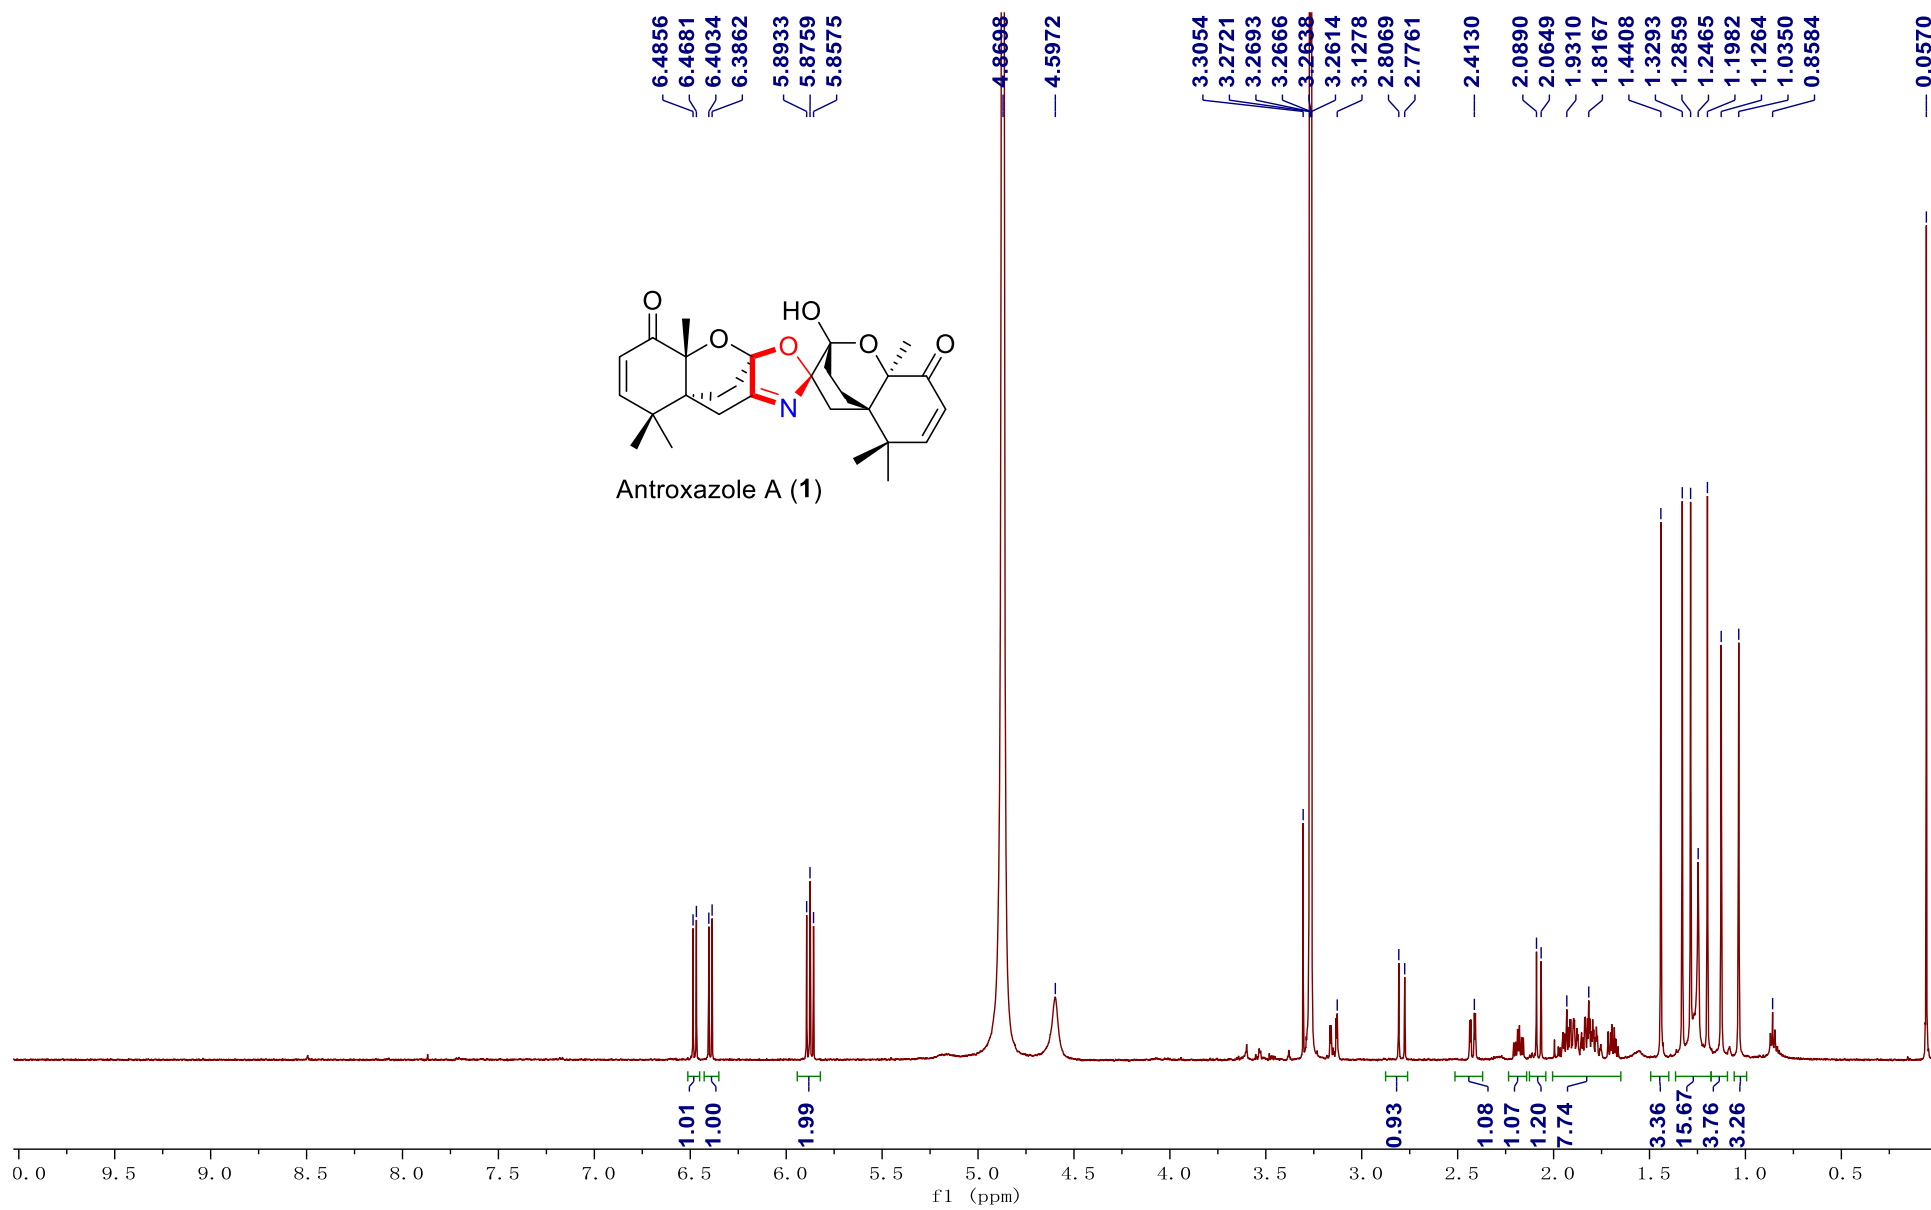

Figure S2.  $^{13}\text{C}$  and DEPT NMR spectra for antroxazole A (1)

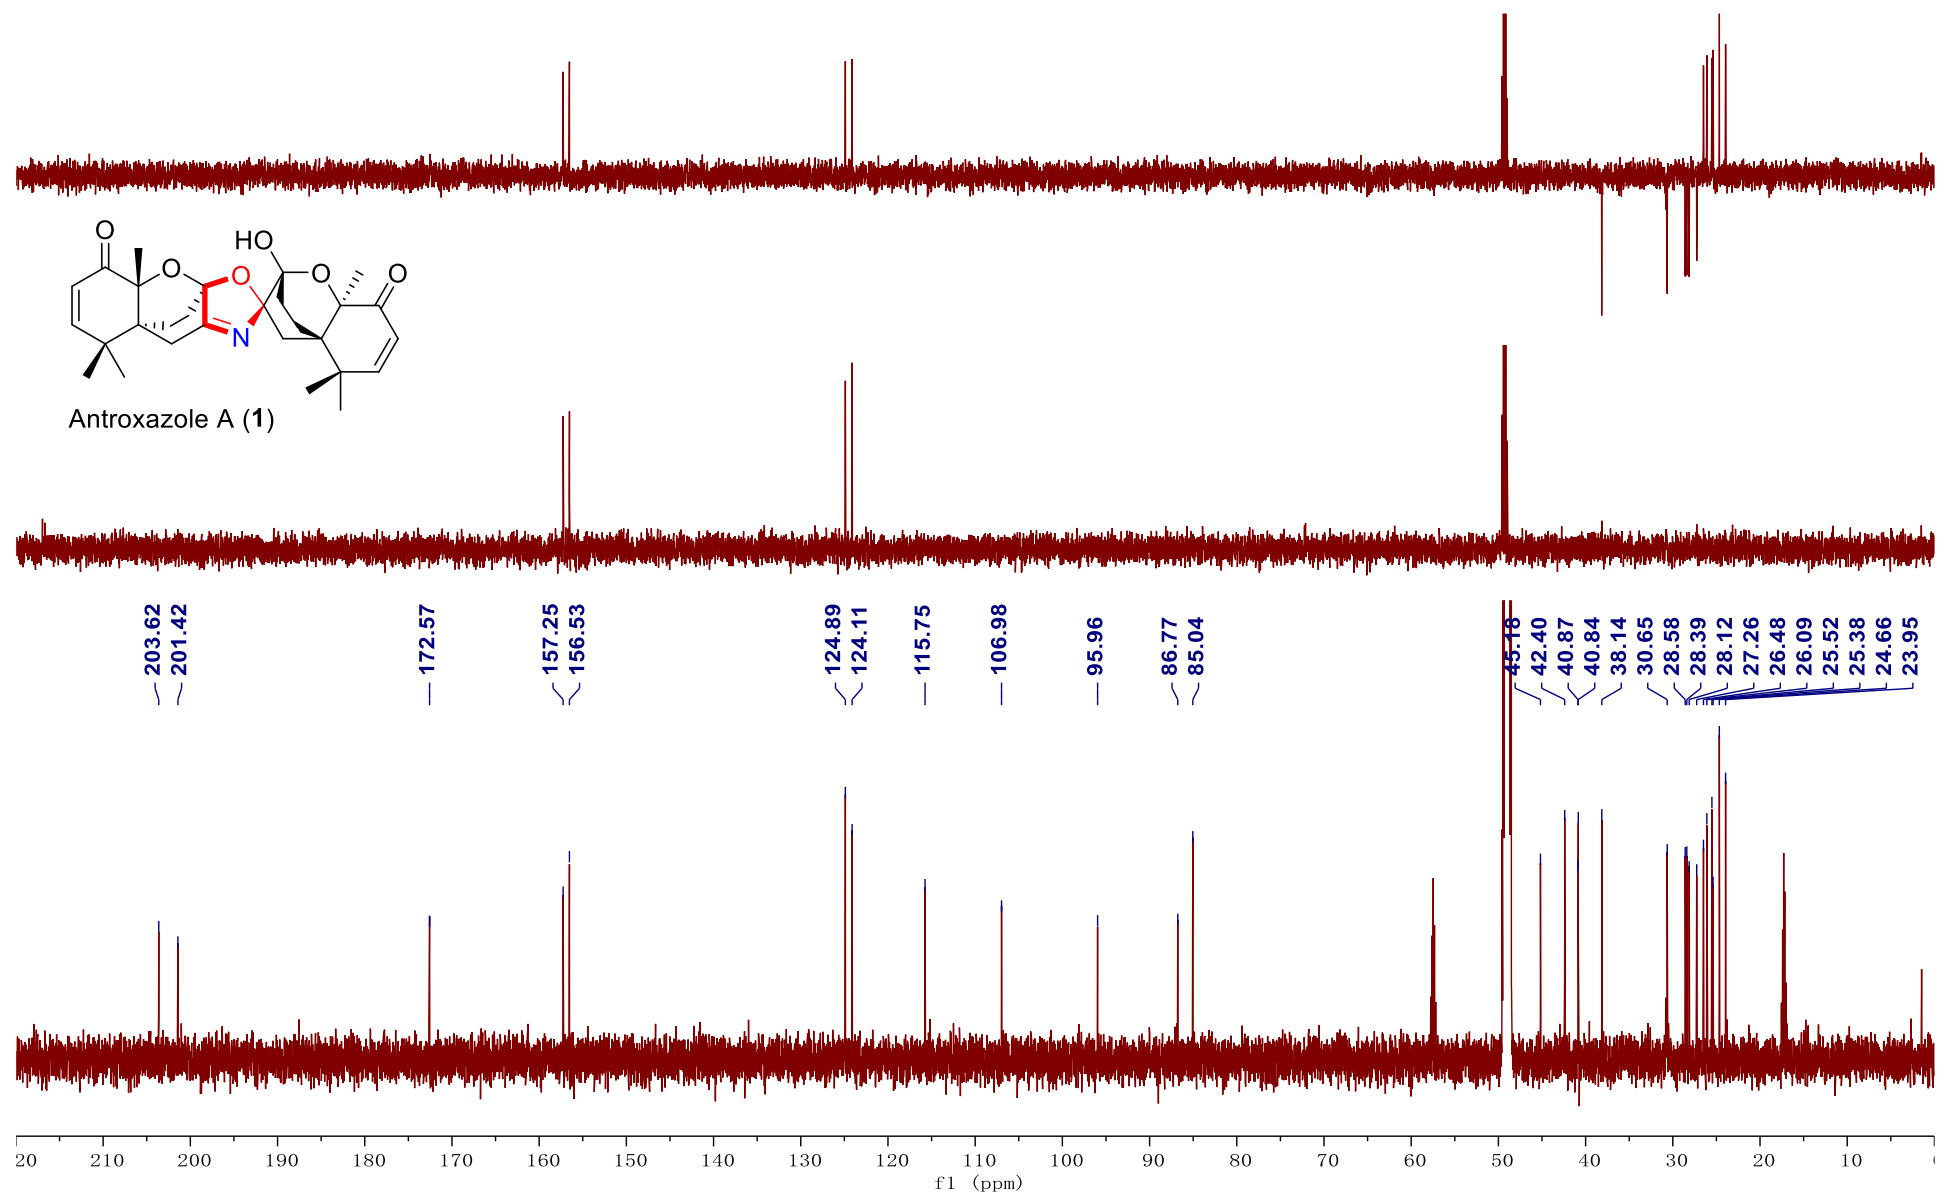

Figure S3. HSQC spectrum for antroxazole A (1)

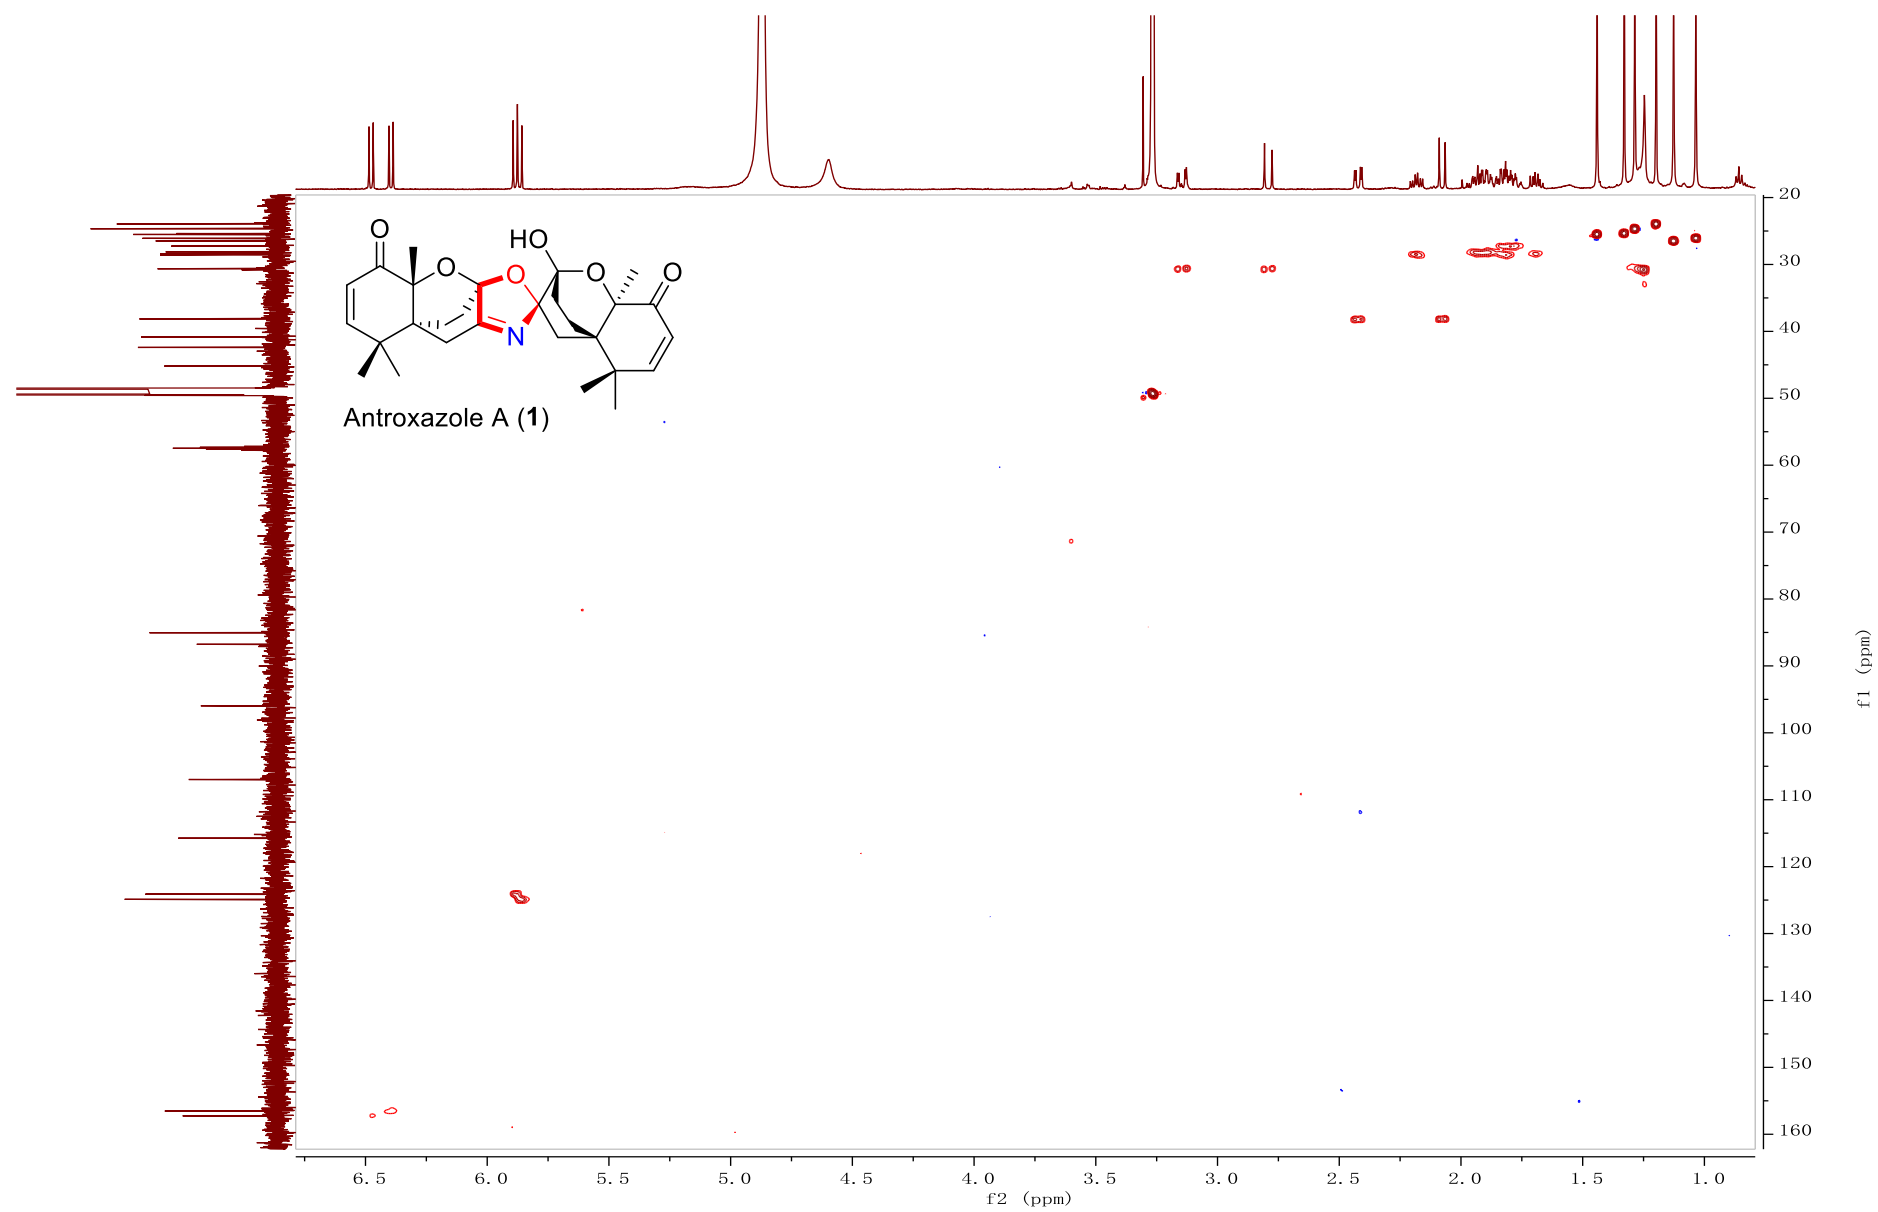

Figure S4. HMBC spectrum for antroxazole A (1)

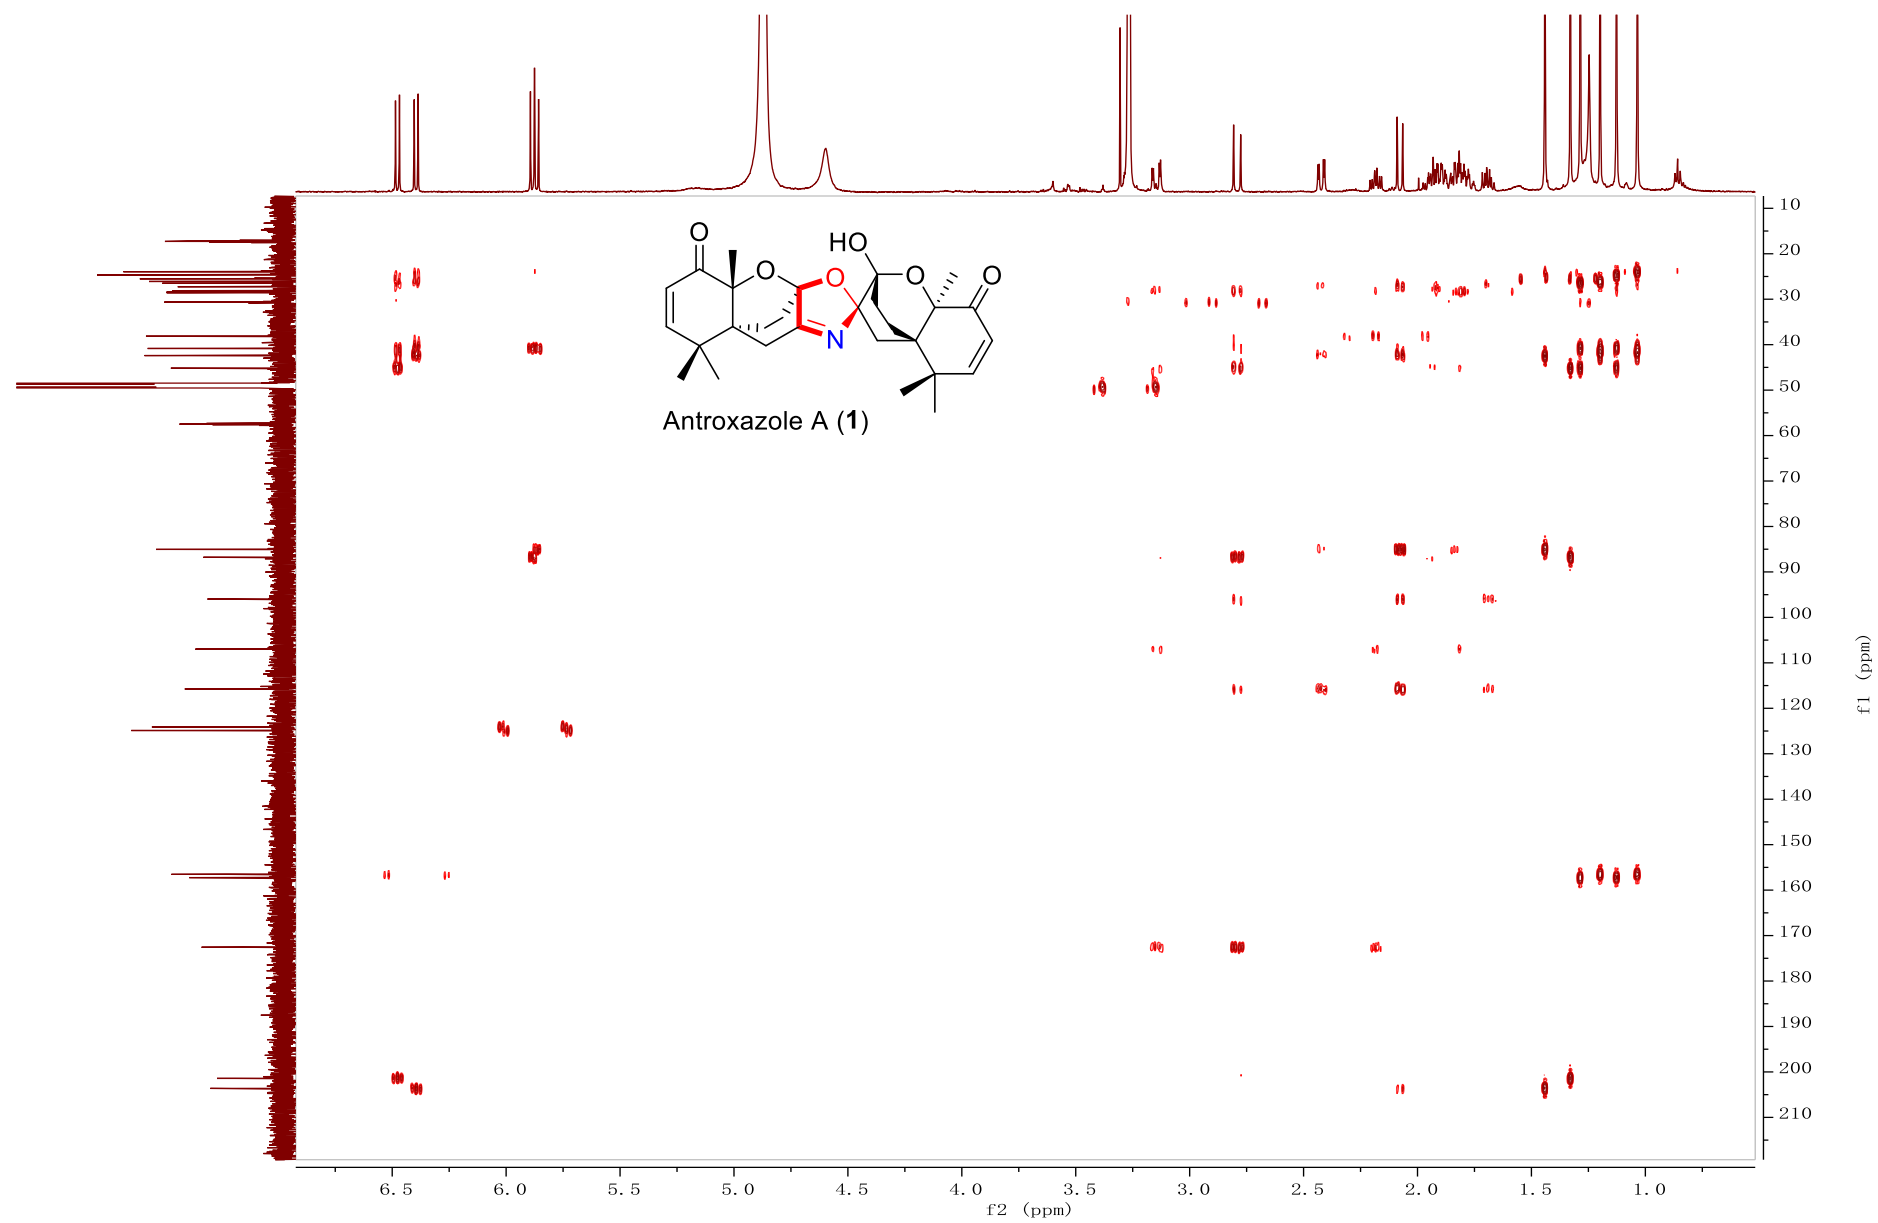

Figure S5.  $^1\text{H}$ - $^1\text{H}$  COSY spectrum for antroxazole A (1)

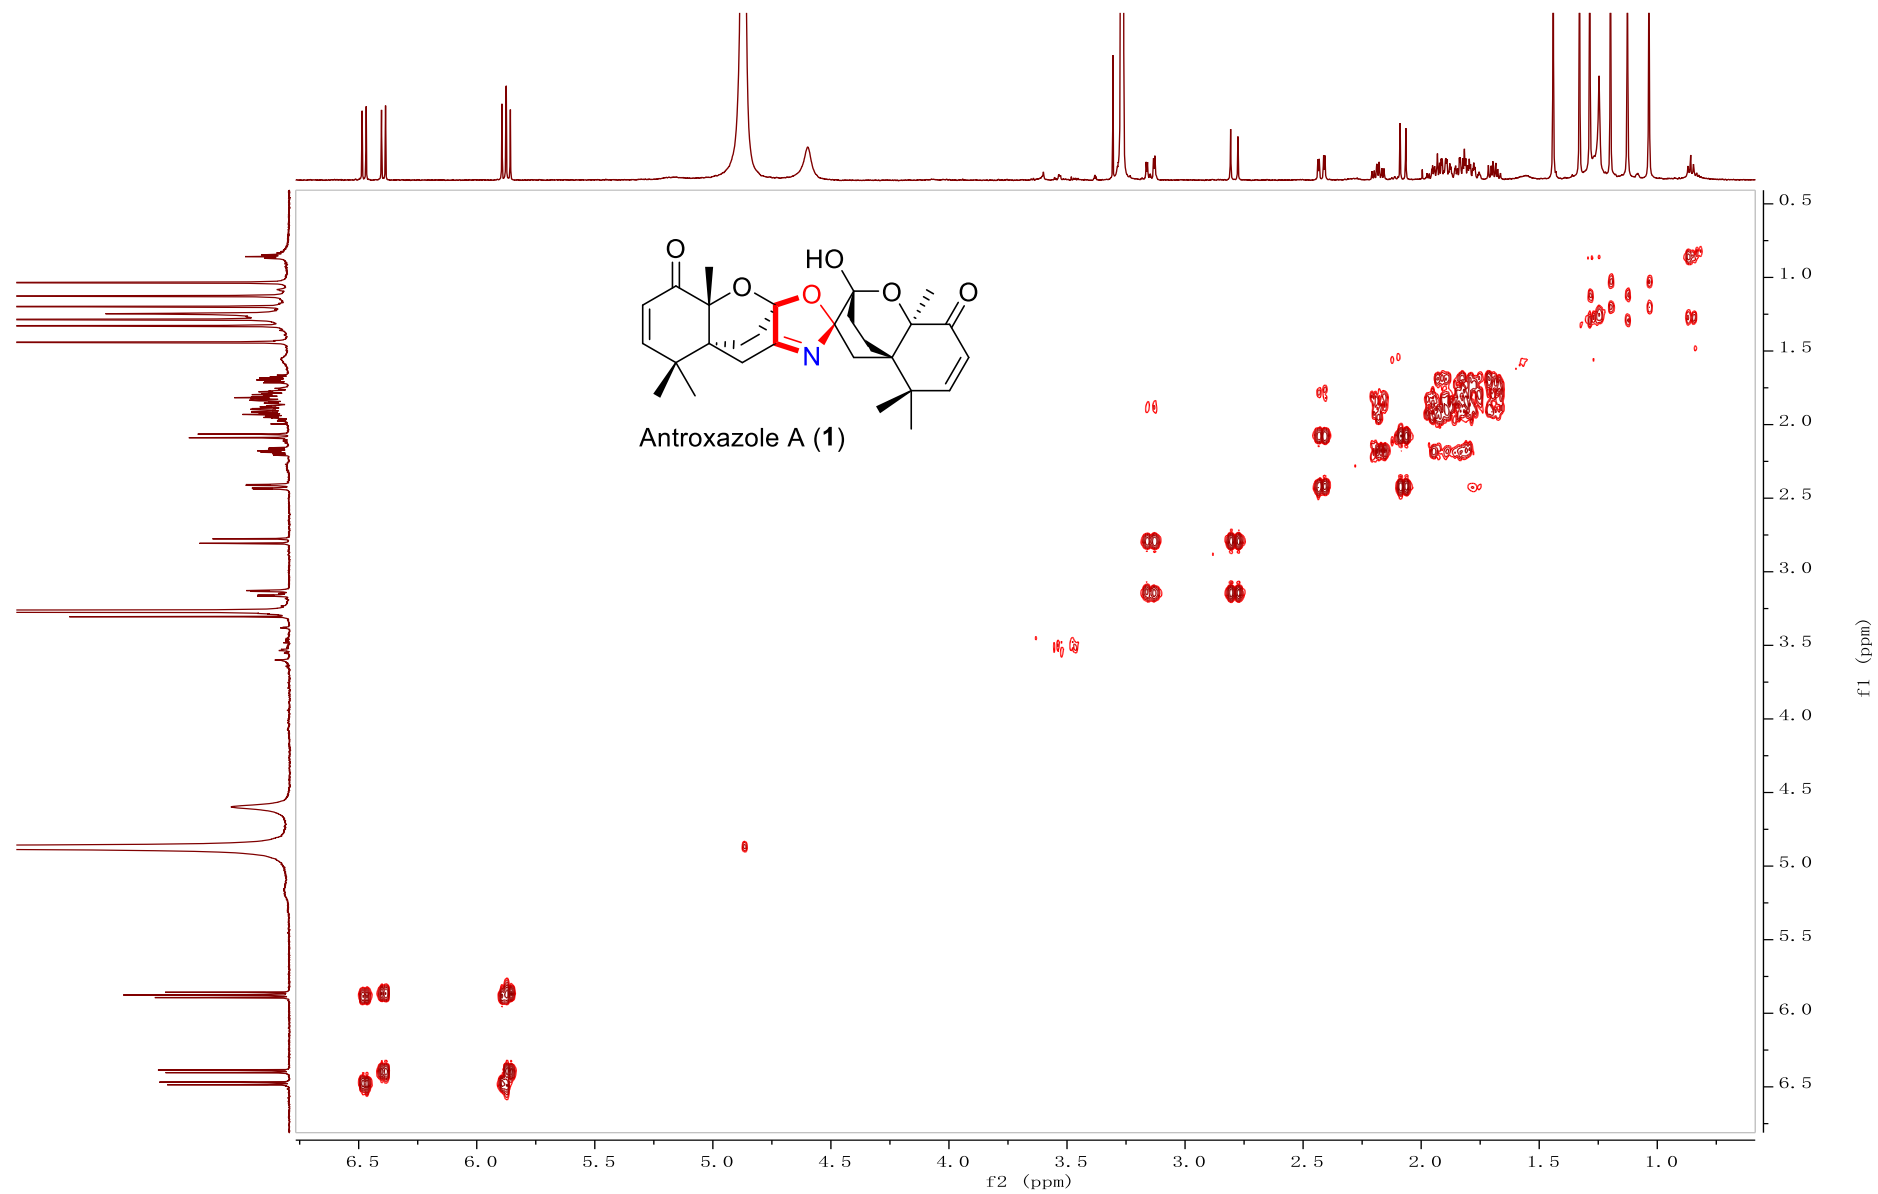

Figure S6. ROESY spectrum for antroxazole A (1)

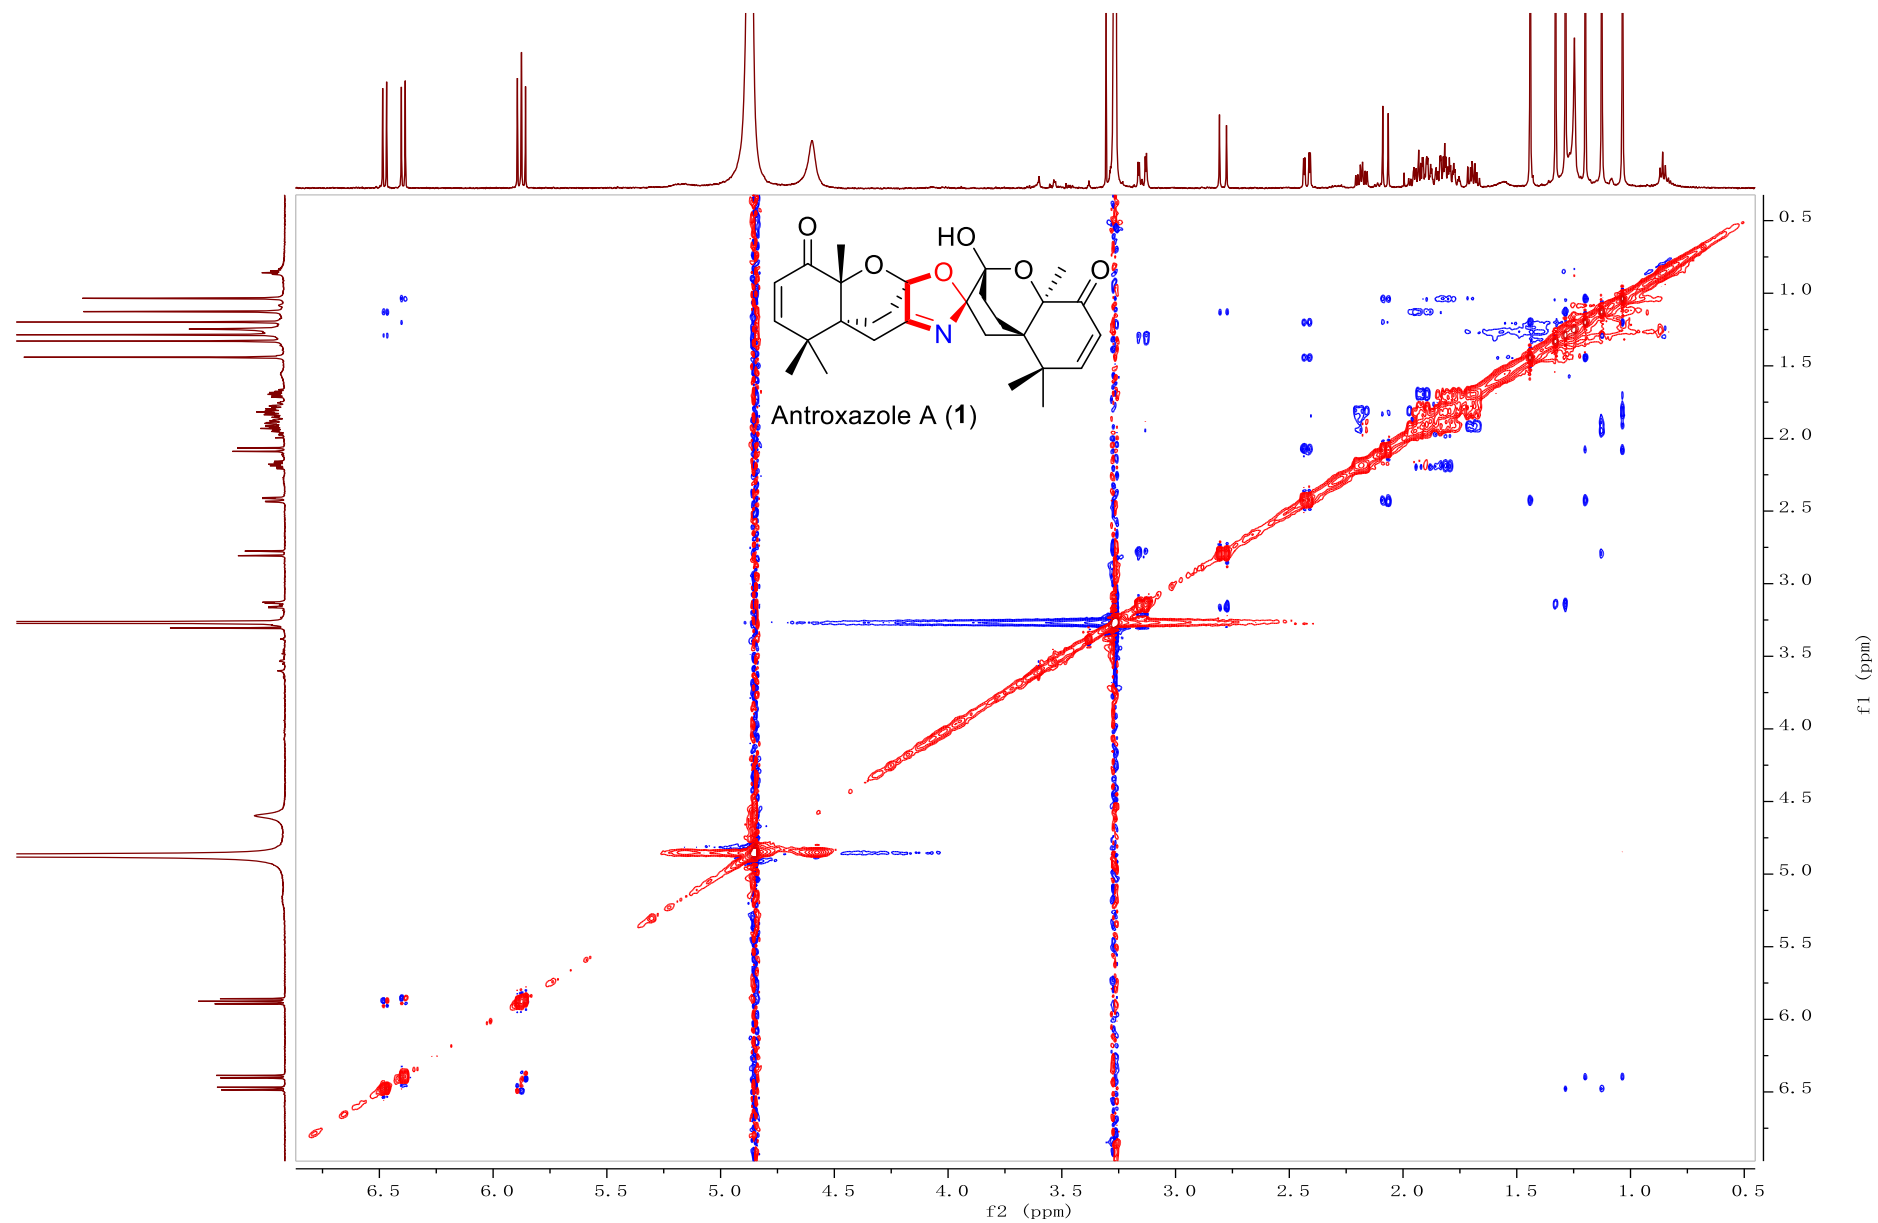

Figure S7. HRESIMS for antroxazole A (1)

LYA-64 #13 RT: 0.17 AV: 1 NL: 4.95E8  
T: FTMS + p ESI Full lock ms [150.0000-1100.0000]

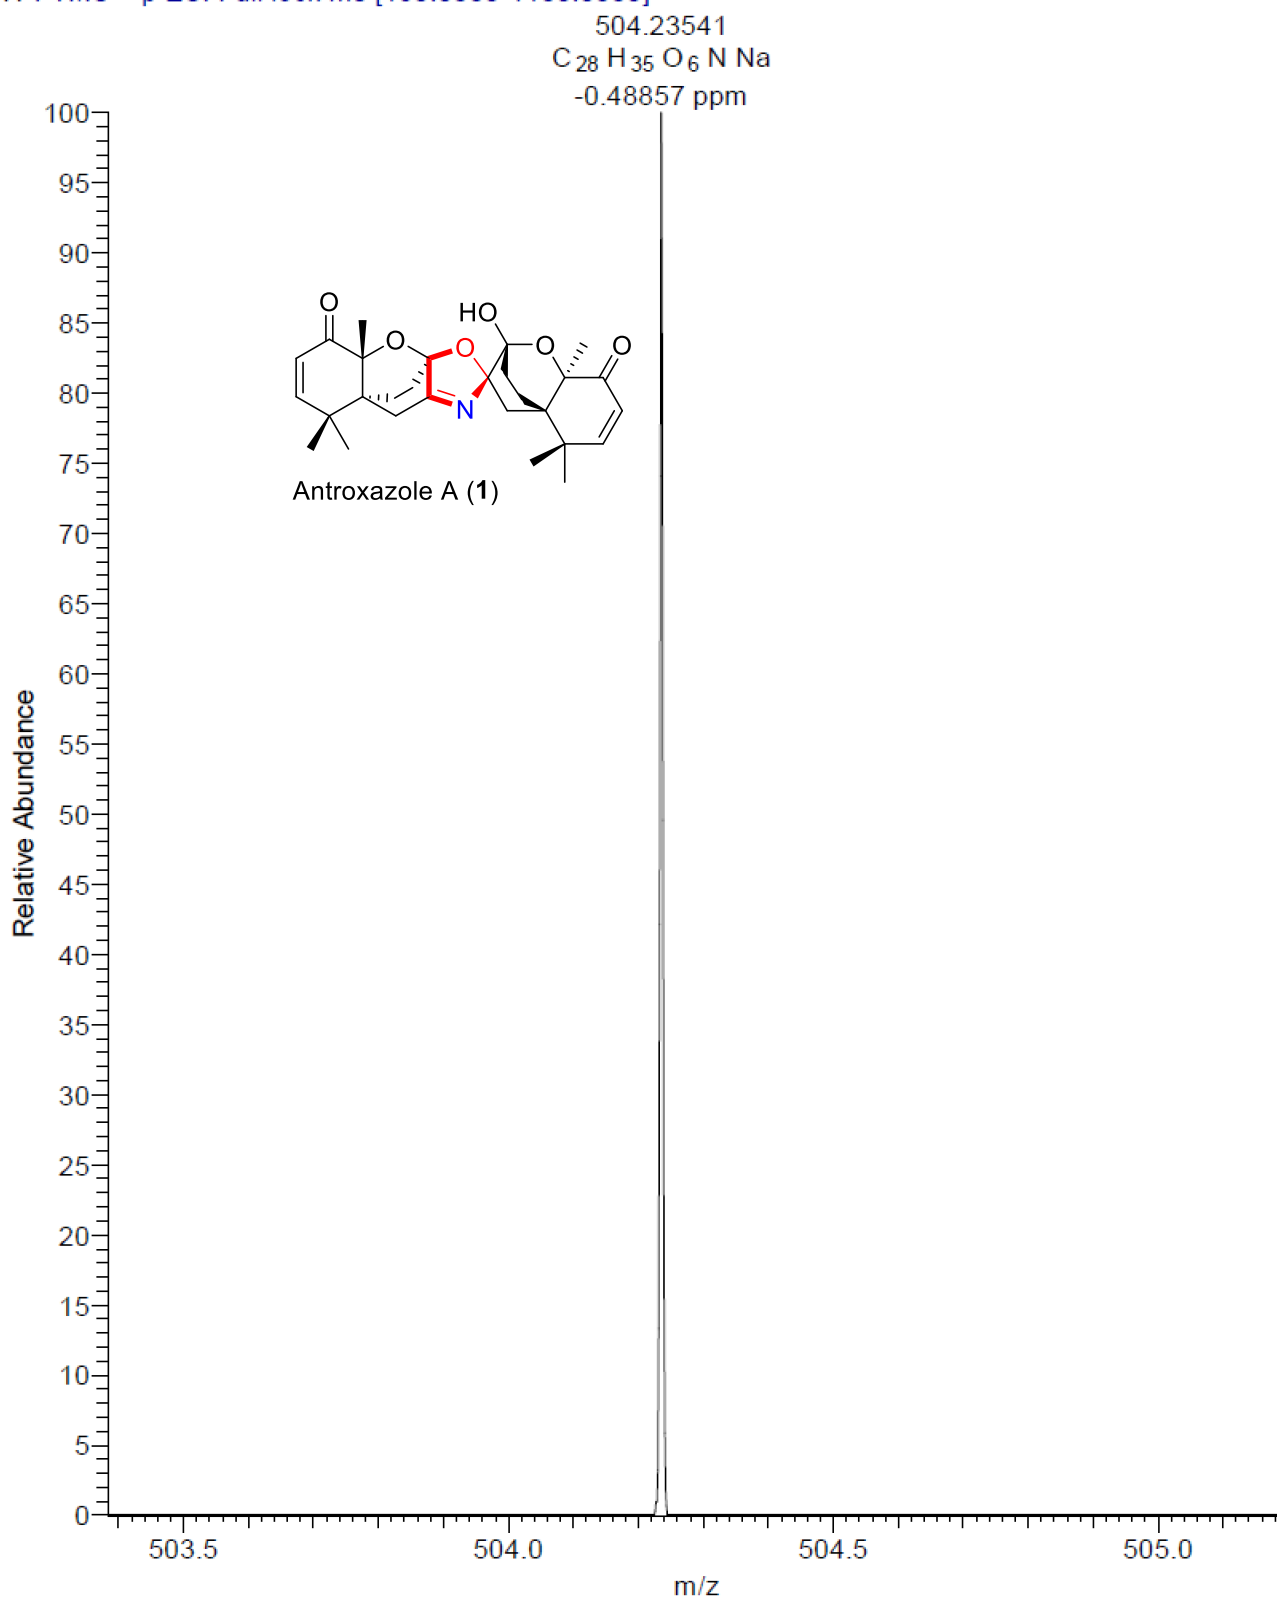



## Crystal data and structure refinement for antroxazole A (1).

|                                   |                                                                                                                                                          |
|-----------------------------------|----------------------------------------------------------------------------------------------------------------------------------------------------------|
| Identification code               | global                                                                                                                                                   |
| Empirical formula                 | C <sub>28</sub> H <sub>35</sub> N O <sub>6</sub>                                                                                                         |
| Formula weight                    | 481.57                                                                                                                                                   |
| Temperature                       | 100(2) K                                                                                                                                                 |
| Wavelength                        | 1.54178 Å                                                                                                                                                |
| Crystal system                    | Monoclinic                                                                                                                                               |
| Space group                       | P 1 21 1                                                                                                                                                 |
| Unit cell dimensions              | a = 6.3881(4) Å                      α = 90°.<br>b = 11.9470(7) Å                      β = 98.325(3)°.<br>c = 15.7014(9) Å                      γ = 90°. |
| Volume                            | 1185.68(12) Å <sup>3</sup>                                                                                                                               |
| Z                                 | 2                                                                                                                                                        |
| Density (calculated)              | 1.349 Mg/m <sup>3</sup>                                                                                                                                  |
| Absorption coefficient            | 0.765 mm <sup>-1</sup>                                                                                                                                   |
| F(000)                            | 516                                                                                                                                                      |
| Crystal size                      | 0.900 x 0.120 x 0.040 mm <sup>3</sup>                                                                                                                    |
| Theta range for data collection   | 2.84 to 72.22°.                                                                                                                                          |
| Index ranges                      | -5 ≤ h ≤ 7, -14 ≤ k ≤ 14, -19 ≤ l ≤ 19                                                                                                                   |
| Reflections collected             | 19093                                                                                                                                                    |
| Independent reflections           | 4663 [R(int) = 0.1013]                                                                                                                                   |
| Completeness to theta = 72.22°    | 99.8 %                                                                                                                                                   |
| Absorption correction             | Semi-empirical from equivalents                                                                                                                          |
| Max. and min. transmission        | 0.97 and 0.74                                                                                                                                            |
| Refinement method                 | Full-matrix least-squares on F <sup>2</sup>                                                                                                              |
| Data / restraints / parameters    | 4663 / 1 / 323                                                                                                                                           |
| Goodness-of-fit on F <sup>2</sup> | 1.046                                                                                                                                                    |
| Final R indices [I > 2σ(I)]       | R1 = 0.0402, wR2 = 0.0930                                                                                                                                |
| R indices (all data)              | R1 = 0.0476, wR2 = 0.0973                                                                                                                                |
| Absolute structure parameter      | -0.10(11)                                                                                                                                                |
| Largest diff. peak and hole       | 0.321 and -0.209 e.Å <sup>-3</sup>                                                                                                                       |

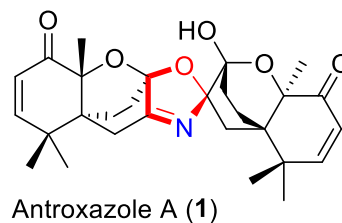

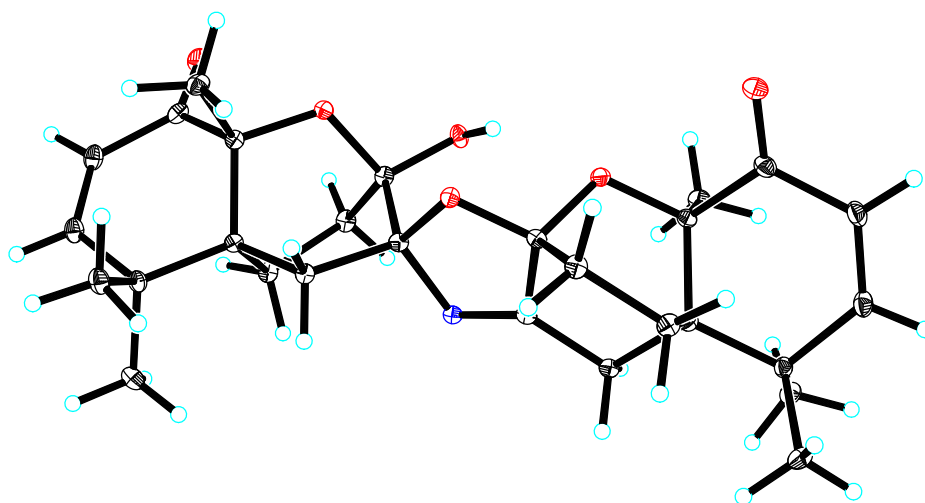

View of a molecule of antroxazole A (**1**) with the atom-labelling scheme.

Displacement ellipsoids are drawn at the 30% probability level.

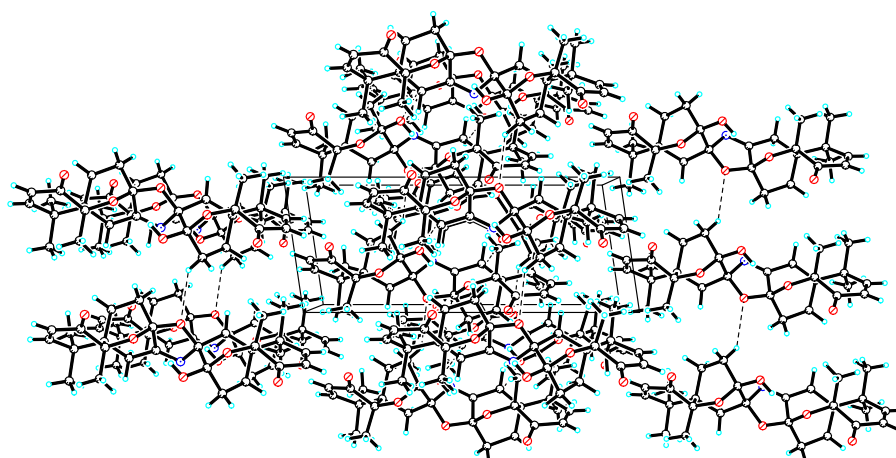

View of the pack drawing of antroxazole A (**1**).

Hydrogen-bonds are shown as dashed lines.
